# Supplementary material for: Algebraic encoding scheme for aperture 3 hexagonal discrete global grid system
Source: Springer Nature journal article supplement (doi:10.1007/s11430-017-9111-y), 2017-12-15
Supplement: 11430_2017_9111_MOESM1_ESM.pdf [file 11430_2017_9111_MOESM1_ESM.pdf]

### Appendix 1

**Theorem 1:** On the complex plane, let  $\omega = \frac{1}{2} + \frac{\sqrt{3}}{2}i$ ,  $D_o = \{0, \omega, \omega^2, \omega^3, \omega^4, \omega^5, \omega^6\}$ , and  $D_e = \{0, \omega + \omega^2, \omega^2 + \omega^3, \omega^3 + \omega^4, \omega^4 + \omega^5, \omega^5 + \omega^6, \omega^6 + \omega\}$ .

The set of cell centers of A3H grid system is given by

$$\mathbb{L}_n = \sum_{i=1}^{\lfloor \frac{n+1}{2} \rfloor} \frac{1}{3^i} D_o + \sum_{j=2}^{\lceil \frac{n+1}{2} \rceil} \frac{1}{3^j} D_e \quad (n \geq 1),$$

where  $\sum$  and  $+$  denote accumulation among sets,  $\lfloor \cdot \rfloor$  is the operator for rounding down, and  $\lceil \cdot \rceil$  is the operator for rounding up.

**Proof:** Let  $r_{n-1}$  denote the radius of the circumcircle of the  $(n-1)$ th level and  $\mathbb{L}_n$  be the set of cell centers at the  $n$ th level. According to the A3H grid system generation rule,  $\mathbb{L}_n$  can be expressed as

$$\mathbb{L}_n = \begin{cases} \mathbb{L}_{n-1} + r_{n-1} D_o & n = 2k - 1 \\ \mathbb{L}_{n-1} + \frac{1}{\sqrt{3}} r_{n-1} D_e & n = 2k \end{cases} \quad (k = 1, 2, 3, \dots) \quad (\text{a1})$$

Two cases are discussed as follows.

1° If  $n=2k$ , in terms of eq. (a1), then cell center sets have recursive relations between odd levels and even levels as follows:

$$\begin{aligned} \mathbb{L}_n &= \mathbb{L}_{2k} \\ &= \mathbb{L}_{2k-1} + \frac{1}{\sqrt{3}} r_{2k-1} D_e \\ &= (\mathbb{L}_{2k-2} + r_{2k-2} D_o) + \frac{1}{\sqrt{3}} r_{2k-1} D_e \\ &= \left( \mathbb{L}_{2k-3} + \frac{1}{\sqrt{3}} r_{2k-3} D_e \right) + r_{2k-2} D_o + \frac{1}{\sqrt{3}} r_{2k-1} D_e \\ &= (\mathbb{L}_{2k-4} + r_{2k-4} D_o) + \frac{1}{\sqrt{3}} r_{2k-3} D_e + r_{2k-2} D_o + \frac{1}{\sqrt{3}} r_{2k-1} D_e \\ \text{M} \\ &= \mathbb{L}_1 + (r_2 D_o + r_4 D_o + \dots + r_{2k-2} D_o) + \frac{1}{\sqrt{3}} (r_1 D_e + r_3 D_e + \dots + r_{2k-1} D_e) \\ &= \mathbb{L}_1 + \sum_{i=1}^{k-1} r_{2i} D_o + \frac{1}{\sqrt{3}} \sum_{j=1}^k r_{2j-1} D_e, \end{aligned}$$

where  $\sum$  represents accumulation among sets and  $+$  is the addition operator.

In addition, since  $\frac{r_{i-1}}{r_i} = \sqrt{3}$ ,

$$r_i = \frac{1}{\sqrt{3}} r_{i-1} = \left( \frac{1}{\sqrt{3}} \right)^2 r_{i-2} = \left( \frac{1}{\sqrt{3}} \right)^3 r_{i-3} = \dots = \left( \frac{1}{\sqrt{3}} \right)^{i-2} r_2 = \left( \frac{1}{\sqrt{3}} \right)^{i-1} r_1,$$

so

$$\mathbb{L}_n = \mathbb{L}_1 + \sum_{i=1}^{k-1} r_{2i} D_o + \frac{1}{\sqrt{3}} \sum_{j=1}^k r_{2j-1} D_e = \mathbb{L}_1 + \sqrt{3} r_1 \sum_{i=1}^{k-1} \frac{1}{3^i} D_o + \sqrt{3} r_1 \sum_{j=1}^k \frac{1}{3^j} D_e.$$

Let  $\mathbb{L}_1 = \frac{1}{3} D_o$ ; thus,  $r_1 = \frac{1}{3\sqrt{3}}$ , and now

$$\mathbb{L}_n = \frac{1}{3} D_o + \frac{1}{3} \sum_{i=1}^{k-1} \frac{1}{3^i} D_o + \frac{1}{3} \sum_{j=1}^k \frac{1}{3^j} D_e = \frac{1}{3} D_o + \sum_{i=1}^{k-1} \frac{1}{3^{i+1}} D_o + \sum_{j=1}^k \frac{1}{3^{j+1}} D_e = \sum_{i=1}^k \frac{1}{3^i} D_o + \sum_{j=2}^{k+1} \frac{1}{3^j} D_e. \tag{a2}$$

Owing to  $n=2k$ , it is easy to see that  $\lfloor \frac{n+1}{2} \rfloor = \lfloor k + \frac{1}{2} \rfloor = k$  and  $\lceil \frac{n+1}{2} \rceil = \lceil k + \frac{1}{2} \rceil = k + 1$ , hence eq. (a2) is equivalent to

$$\mathbb{L}_n = \sum_{i=1}^{\lfloor \frac{n+1}{2} \rfloor} \frac{1}{3^i} D_o + \sum_{j=2}^{\lceil \frac{n+1}{2} \rceil} \frac{1}{3^j} D_e \quad (n = 2k, k = 1, 2, 3, \dots).$$

2° If  $n=2k-1$ , it can likewise be obtained that

$$\mathbb{L}_n = \mathbb{L}_{2k-1} = \sum_{i=1}^k \frac{1}{3^i} D_o + \sum_{j=2}^k \frac{1}{3^j} D_e. \tag{a3}$$

Since  $n=2k-1$ , then  $\lfloor \frac{n+1}{2} \rfloor = \lfloor k \rfloor = k$  and  $\lceil \frac{n+1}{2} \rceil = \lceil k \rceil = k$ ; thus, eq. (a3) is equivalent to

$$\mathbb{L}_n = \sum_{i=1}^{\lfloor \frac{n+1}{2} \rfloor} \frac{1}{3^i} D_o + \sum_{j=2}^{\lceil \frac{n+1}{2} \rceil} \frac{1}{3^j} D_e \quad (n = 2k - 1, k = 1, 2, 3, \dots).$$

Therefore, Theorem 1 holds whether  $n$  is even or odd.

**Theorem 2:** Let  $\mathbb{P}_0 = \{0\}$  and  $\mathbb{P}_1 = \frac{1}{3} D_o^* \cup \{0\}$ . A portion of cell center set  $\mathbb{L}_n$  can be expressed as

$$\mathbb{P}_n = \begin{cases} \mathbb{P}_{n-1} \cup \left( \mathbb{P}_{n-2} + \frac{1}{3^{\frac{n+1}{2}}} D_o^* \right) & n = 2k - 1 \\ \mathbb{P}_{n-1} \cup \left( \mathbb{P}_{n-2} + \frac{1}{3^{\frac{n+2}{2}}} D_e^* \right) & n = 2k \end{cases} \quad (k = 1, 2, 3, \dots).$$

In addition, there exists unique and definite

$$e_i \in \begin{cases} \frac{1}{3^{\frac{i+1}{2}}} D_o^* \cup \{0\} & i = 2k - 1 \\ \frac{1}{3^{\frac{i+2}{2}}} D_e^* \cup \{0\} & i = 2k \end{cases} \quad (k = 1, 2, 3, \dots)$$

to let  $\sum_{i=1}^n e_i$  denote  $\beta \in \mathbb{P}_n$ , where  $e_i = 0$  or  $e_{i+1} = 0$  ( $1 \leq i \leq n-1$ ).

**Proof:** According to eq. (2), odd levels of A3H grid system establish a radix system with base 3 and digit set  $D_o$ , and even levels of A3H grid system establish a radix system with base 3 and digit set  $D_e$ . The aperture of the two radix systems is 9 for both, and their directions are both constant. Let  $\mathbb{L}_{n-2} (n \geq 2)$  be  $\beta_{n-2}$ . Under the original condition of the grid cells in Theorem 1, new generated cell centers of  $\beta_{n-2}$  at  $\mathbb{L}_n$  are computed as follows:

$$\beta_{n,k} = \begin{cases} \beta_{n-2} + \frac{1}{3^{\frac{n+1}{2}}} \omega^k = \beta_{n-2} + \frac{1}{3^{\frac{n+1}{2}}} D_o^* & n = 1, 3, 5, \dots \\ \beta_{n-2} + \frac{1}{3^{\frac{n+2}{2}}} (\omega^k + \omega^{k+1}) = \beta_{n-2} + \frac{1}{3^{\frac{n+2}{2}}} D_e^* & n = 0, 2, 4, \dots \end{cases} \quad (k = 1, 2, \dots, 6). \tag{a4}$$

Eq. (a4) is obtained by recursion between interval levels (i.e., the top line or bottom line of eq. (2)). Compared with eq. (1)

using neighboring levels, it has two main advantages. First, only cell centers at  $\mathbb{L}_{n-2}$  can generate new cell centers at the  $n$ th level; hence, sets of cell centers at every level are subsets of  $\mathbb{L}_n$ , and the numbers of cell centers are greatly decreased. Second, grid cells corresponding to  $\beta_{n,k}$  are always inside the grid cells corresponding to  $\beta_{n-2}$  and never exceed the cell edge of the first level, which facilitates extension onto the sphere.

Define the set of cell centers at the  $n$ th ( $n \geq 0$ ) level generated by the method above to be  $\mathbb{P}_n$ . Taking the nested relation of sets of cell centers into account,  $\mathbb{P}_n$  comprises new cell centers generated by  $\mathbb{P}_{n-1}$  and  $\mathbb{P}_{n-2}$  at  $\mathbb{P}_n$ . By known conditions  $\mathbb{P}_0 = \mathbb{L}_0 = \{0\}$  and  $\mathbb{P}_1 = \mathbb{L}_1 = \frac{1}{3}D_o^* \cup \{0\}$ , according to eq. (a4),  $\mathbb{P}_n$  is given by

$$\mathbb{P}_n = \begin{cases} \mathbb{P}_{n-1} \cup \left( \mathbb{P}_{n-2} + \frac{1}{3^{\frac{n+1}{2}}} D_o^* \right) & n = 2k - 1 \\ \mathbb{P}_{n-1} \cup \left( \mathbb{P}_{n-2} + \frac{1}{3^{\frac{n+2}{2}}} D_e^* \right) & n = 2k \end{cases} \quad (k = 1, 2, 3, L). \tag{a5}$$

Expanding eq. (a5) recursively, the direct expression of  $\mathbb{P}_n$  is obtained as

$$\mathbb{P}_n = \begin{cases} \mathbb{P}_0 \cup \mathbb{P}_1 \cup \left( \mathbb{P}_0 + \frac{1}{3^2} D_e^* \right) \cup \left( \mathbb{P}_1 + \frac{1}{3^2} D_o^* \right) \cup L \cup \left( \mathbb{P}_{n-2} + \frac{1}{3^{\frac{n+1}{2}}} D_o^* \right) & n = 2k - 1, \\ \mathbb{P}_0 \cup \mathbb{P}_1 \cup \left( \mathbb{P}_0 + \frac{1}{3^2} D_e^* \right) \cup \left( \mathbb{P}_1 + \frac{1}{3^2} D_o^* \right) \cup L \cup \left( \mathbb{P}_{n-2} + \frac{1}{3^{\frac{n+2}{2}}} D_e^* \right) & n = 2k. \end{cases} \tag{a6}$$

Eq. (a6) shows that cell centers at  $\mathbb{P}_n$  can be denoted in turn by the accumulation of  $\frac{1}{3}D_o^* \cup \{0\}$ ,  $\frac{1}{3^2}D_e^* \cup \{0\}$ ,  $\frac{1}{3^3}D_o^* \cup \{0\}$ , ...,  $\frac{1}{3^{\frac{n+1}{2}}}D_o^* \cup \{0\}$  ( $\frac{1}{3^{\frac{n+2}{2}}}D_e^* \cup \{0\}$ ). That is,

$$e_i \in \begin{cases} \frac{1}{3^{\frac{i+1}{2}}} D_o^* \cup \{0\} & i = 2k - 1 \\ \frac{1}{3^{\frac{i+2}{2}}} D_e^* \cup \{0\} & i = 2k \end{cases} \quad (k = 1, 2, 3, L)$$

exists, which makes  $\beta = \sum_{i=1}^n e_i \in \mathbb{P}_n$ .

Similarly, let  $S_n$  be the set of all cell centers satisfying  $e_i = 0$  or  $e_{i+1} = 0$ , and let it be of the form  $\beta = \sum_{i=1}^n e_i$ . According to eq. (a5),

$$S_n = \begin{cases} S_{n-1} \cup \left( S_{n-2} + \frac{1}{3^{\frac{n+1}{2}}} D_o^* \right) & n = 2k - 1 \\ S_{n-1} \cup \left( S_{n-2} + \frac{1}{3^{\frac{n+2}{2}}} D_e^* \right) & n = 2k \end{cases} \quad (k = 1, 2, 3, L).$$

Here,  $S_n$  comprises  $S_{n-1}$  together with  $S_{n-2} + \frac{1}{3^{\frac{n+1}{2}}} D_o^*$  or  $S_{n-2} + \frac{1}{3^{\frac{n+2}{2}}} D_e^*$ . Cell centers at  $S_{n-1}$  can be denoted by

$\beta = \sum_{i=1}^{n-1} e_i$ , and in terms of the form of  $S_n$ , can also be denoted by  $\beta = \sum_{i=1}^n e_i = \sum_{i=1}^{n-1} e_i + e_n$ , hence  $e_n = 0$ . Similarly, cell

centers at  $S_{n-2} + \frac{1}{3^2} D_o^*$  or  $S_{n-2} + \frac{1}{3^2} D_e^*$  can be denoted by  $\beta = \sum_{i=1}^{n-2} e_i + e_n$ , where  $e_n \in \frac{1}{3^2} D_o^* \cup \{0\}$  or  $e_n \in \frac{1}{3^2} D_e^* \cup \{0\}$ , and in the form of  $S_n$ ,  $\beta = \sum_{i=1}^n e_i = \sum_{i=1}^{n-2} e_i + e_{n-1} + e_n$ , hence  $e_{n-1} = 0$ . It is easy to verify that  $S_n = \mathbb{P}_n$  when  $n=0,1$ , and, according to the recursive relation, for all  $n$ ,  $S_n = \mathbb{P}_n$ .

Now we prove the uniqueness of representation of  $\beta$ . For  $n=0,1$ ,  $S_n = \mathbb{P}_n$  the uniqueness is easy to verify. Suppose that the representation is not unique, that is, that  $\sum_{i=1}^n e_i = \sum_{i=1}^n e'_i$ . If  $e_n = e'_n$ , then  $\sum_{i=1}^{n-1} e_i = \sum_{i=1}^{n-1} e'_i$ , and hence  $e_i = e'_i$ . If  $e_n \neq e'_n$ , two cases exist. The first case is that either  $e_n$  or  $e'_n$  is equal to 0. Let  $e'_n = 0$ , so  $e_n = \sum_{i=1}^{n-1} (e'_i - e_i) \in \mathbb{P}_{n-1}$  because  $\sum_{i=1}^n e_i = \sum_{i=1}^n e'_i$ , which contradicts  $e_n \notin \mathbb{P}_{n-1}$ . The second case is that neither  $e_n$  nor  $e'_n$  is equal to 0. Because  $e_i = 0$  or  $e_{i-1} = 0$ ,  $e_{n-1} = 0$ . The form of cell center becomes  $S_{n-2} + \frac{1}{3^2} D_o^*$  or  $S_{n-2} + \frac{1}{3^2} D_e^*$ , so  $e_n - e'_n = \sum_{i=1}^{n-2} (e'_i - e_i) \in \mathbb{P}_{n-2}$ ; this contradicts  $e_n - e'_n \notin \mathbb{P}_{n-2}$ . The two cases above show that the representation  $\beta = \sum_{i=1}^n e_i$  is unique.

Therefore, Theorem 2 holds.
